# Supplementary material
Source: MDPI journal article supplement (https://www.mdpi.com/1996-1073/13/4/975)
Supplement: s1 [file s1]

# 1 Detail of all subclusters

Tabell 1: Subclusters of sustainability science. Subcluster are sorted by average publication year in each parent cluster.

| #    | Parent_cluster    | Nodes | Year    | TFIDF                                                                                                                                                                                                                                                                                                    |
|------|-------------------|-------|---------|----------------------------------------------------------------------------------------------------------------------------------------------------------------------------------------------------------------------------------------------------------------------------------------------------------|
| 1_5  | Soil, agriculture | 2961  | 2014.07 | Amf, Pgpr, Arbuscular, Rhizosphere, Rhizobacterium, Pgpb, Endophytic, Plant growth promotion, Phosphate solubilization, Arbuscular mycorrhizal fungi, Mycorrhizal, Inoculation, Biofertilizer, Fungi, Fungal                                                                                             |
| 1_7  | Soil, agriculture | 1841  | 2013.85 | Nue, Phosphoru, Struvite, Nutrient, Soil, Nitrogen, Fertilizer, Nitrogen use efficiency, Maize, Grain yield, Use efficiency, Kg ha, Agricultural, Organic, Nitrate                                                                                                                                       |
| 1_2  | Soil, agriculture | 3101  | 2013.45 | Agroecology, Agricultural, Farmer, Sustainable intensification, Agroecological, Yield gap, Food security, Maize, Agriculture, Crop, Agrobiodiversity, Ksr, Farm, Land, Rice                                                                                                                              |
| 1_3  | Soil, agriculture | 3092  | 2012.00 | Tillage system, Nt, Fym, Npk, Maize, Soc, Zt, Conventional tillage, Conservation agriculture, Wheat, Grain yield, Soil, Rice wheat, Residue retention, Organic                                                                                                                                           |
| 1_10 | Soil, agriculture | 1487  | 2011.99 | Organic farming, Organic agriculture, Conventional farming, Organic system, Mj ha, Agricultural, Soil, Nutrient, Olive, Conv, Farm, Fertilizer, Organic farm, Environmental, Farmer                                                                                                                      |
| 1_4  | Soil, agriculture | 3062  | 2011.99 | Ipm, Crylac, Weed, Bt cotton, Natural enemy, Pest management, Insect, Insecticide, Parasitoid, Aphid, Transgenic, Glyphosate, Pollinator, Wild bee, Herbicide                                                                                                                                            |
| 1_6  | Soil, agriculture | 2549  | 2011.30 | Sqi, Soil quality index, Tillage system, Microbial biomas, Organic, Soc, Som, Soil property, Soil health, Nt, Soil organic matter, Soil organic carbon, Fym, Soil function, Soil quality indicator                                                                                                       |
| 1_9  | Soil, agriculture | 1689  | 2010.04 | Homegarden, Agroforestry system, Tree, Dehesa, Cocoa tree, Silvopastoral system, Cacao, Farmer, Fallow, Maize, Soil fertility, Shade tree, Nutrient, Alley cropping, Montado                                                                                                                             |
| 1_8  | Soil, agriculture | 1764  | 2008.57 | Farmer, Soil erosion, Fallow, Nutrient, Agricultural, Slm, Nutmon, Land degradation, Ethiopium, Maize, Organic, Soil fertility, Adoption, Upland, Swc                                                                                                                                                    |
| 1_1  | Soil, agriculture | 3284  | 2008.10 | Farmer, Agricultural sustainability, Farm level, Organic farming, Sustainable agriculture, Environmental, Agriculture, Economic, Siat, Social, Indicator, Sustainability, System, Animal welfare, Rural                                                                                                  |
| 2_7  | Corporate         | 1883  | 2015.27 | Remanufactured product, Clsc, Closed loop supply chain, Reverse logistic, Supply chain network, Retailer, Manufacturer, Loop supply chain, Environmental, Model, Green, Sustainable supply chain, Intermodal, Weee, Sustainable                                                                          |
| 2_2  | Corporate         | 4146  | 2014.75 | Mql, Lean manufacturing, Machining process, Sustainable machining, Dry machining, Tool wear, Machine tool, Tool life, Aisi, Sustainable manufacturing practice, Kaizen, Cryogenic machining, Inconel, Minimum quantity lubrication, Workpiece                                                            |
| 2_3  | Corporate         | 3914  | 2014.72 | Sscm practice, Gscm practice, Sustainable supply chain management, Sustainable supplier selection, Green supply chain management, Supply chain management, Supplier selection, Green supplier selection, Environmental, Sustainable procurement, Firm, Scm, Supply chain sustainability, Company, Social |
| 2_1  | Corporate         | 5930  | 2013.84 | Csr, Corporate sustainability, Eco innovation, Firm performance, Sme, Sustainable entrepreneurship, Corporate social responsibility, Social enterprise, Company, Environmental, Social entrepreneurship, Green innovation, Organizational, Business model innovation, Entrepreneurial                    |
| 2_9  | Corporate         | 1248  | 2013.66 | Ghrm practice, Green human, Green human resource management practice, Sustainable hrm, Hrm practice, Ergonomic, Employee, Organizational, Hrd, Ethical leadership, Sustainable human resource management, Environmental, Green hrm, Sustainable leadership, Avery                                        |

|      |                           |      |         |                                                                                                                                                                                                                                                                     |
|------|---------------------------|------|---------|---------------------------------------------------------------------------------------------------------------------------------------------------------------------------------------------------------------------------------------------------------------------|
| 2_6  | Corporate                 | 2252 | 2013.52 | Eco industrial park, Eip, Circular economy, Industrial symbiosi, Industrial ecology, Weee, Ce, Circular business model, Waste, Industrial park, Environmental, Electronic equipment, Industrial ecosystem, Kalundborg, Industrial symbiosis network                 |
| 2_8  | Corporate                 | 1669 | 2013.20 | Lcsa framework, Slca, Lca, Environmental impact, Life cycle sustainability assessment, Social life cycle assessment, Social lca, Life cycle assessment, Eco efficiency, Lcc, Economic, Product, Sustainable, Greenscope, Sustainability assessment                  |
| 2_4  | Corporate                 | 3013 | 2012.84 | Ps, Product service system, Ecodesign, Eol, Product development proces, Environmental impact, Elv, Remanufacturing, Pss design, Automotive, Dfe, Sustainable product service system, Lca, Sustainable product design, Eco design                                    |
| 2_10 | Corporate                 | 1178 | 2012.48 | Tqm, Sbsc, Corporate sustainability performance, Environmental, Company, Scorecard, Social, Iso, Sustainable, Sustainability performance, Business excellence, Economic, Sustainable value approach, Balanced scorecard, Organization                               |
| 2_5  | Corporate                 | 2836 | 2011.18 | Sustainable competitive advantage, Firm performance, Intellectual capital, Dynamic capability, Competitive advantage, Sme, Rbv, Tqm, Organizational performance, Knowledge management, Strategic, Company, Organization, Innovation, Open innovation                |
| 3_11 | Ecosystem                 | 1198 | 2015.22 | Sdg, Sustainable development goal, Menstrual, Global, Mdg, Anthropocene, Environmental, Social, Human, Agenda, Geodiversity, Planetary boundary, Economic, Millennium development goal, International                                                               |
| 3_6  | Ecosystem                 | 2337 | 2014.66 | Ecosystem service value, Esv, E, Es, Ecological, Urban, Yuan, Spatial, Water yield, Biodiversity, Total esv, Ecosystem services value, Human, Grassland, Ecosystem services supply                                                                                  |
| 3_2  | Ecosystem                 | 2628 | 2013.58 | Urban expansion, Lst, Lulc, Spatial, Urban growth, Sleuth, China, Land use change, Land consolidation, Urban sprawl, Uhi, Landsat, Rural, Urbanization, Lucc                                                                                                        |
| 3_5  | Ecosystem                 | 2337 | 2013.28 | Transdisciplinary research, Sustainability science, Social learning, Transdisciplinarity, Social ecological, Environmental, Science, Sustainable, Knowledge, Local, Stakeholder, Scientific, Interdisciplinary, Natural, Human                                      |
| 3_1  | Ecosystem                 | 2947 | 2013.25 | Resilience thinking, Climate change adaptation, Social ecological system, Vulnerability, Adaptive capacity, Adaptation, Disaster risk reduction, Disaster, Drr, Urban resilience, Change, Local, Community, Sustainable, Environmental                              |
| 3_8  | Ecosystem                 | 1770 | 2013.02 | Loess plateau, Soil desiccation, China, Grassland, Loes, Ggp, Ecological restoration, Forest, Rocky desertification, Gtgp, Vegetation restoration, Lucc, Karst rocky desertification, Streamflow, Soil moisture                                                     |
| 3_4  | Ecosystem                 | 2509 | 2012.55 | Urban green space, Landscape ecology, Ug, Green space, Greenway, Ecological land, City, Urban forest, Green infrastructure, Urban greenspace, Urban park, Spatial, Tree, Urban ecological, Ecosystem service                                                        |
| 3_3  | Ecosystem                 | 2513 | 2011.63 | Social ecological system, Local, Forest, Community forestry, Common pool resource, Natural, Institutional, Conservation, Common, Indigenou, Livelihood, Sustainable, Ecological, Environmental, Fishery                                                             |
| 3_9  | Ecosystem                 | 1682 | 2011.19 | Environmental flow, River, Dam, Fish, Sediment, Ecohydrology, Ecological, Mekong, Reservoir, Hydrological, Basin, Floodplain, Riparian, Lake, Fluvial                                                                                                               |
| 3_7  | Ecosystem                 | 1813 | 2011.12 | Rangeland degradation, Ldn, Pastoral, Grassland degradation, Pastoralist, Grazing, Anpp, Landcare, Pastoralism, Sheep ha, Herder, Livestock, Desertification, Arid, Qtp                                                                                             |
| 3_10 | Ecosystem                 | 1532 | 2011.01 | Coastal management, Iczm, Integrated coastal management, Icm, Coastal zone management, Marsh, Sediment, Sea level rise, Delta, Shoreline, Marine, Estuary, Integrated coastal zone management, Coast, Coastal erosion                                               |
| 4_2  | Catalyst/ Electrochemical | 2128 | 2016.64 | Oer, Hydrogen evolution reaction, Electrocatalyst, Photocatalytic, Oxygen evolution reaction, Overpotential, Overall water splitting, Electrocatalytic, Photoelectrochemical, Low overpotential, Water splitting, Visible light, Photocatalyst, Mv dec, Tafel slope |

|      |                           |      |         |                                                                                                                                                                                                                                                           |
|------|---------------------------|------|---------|-----------------------------------------------------------------------------------------------------------------------------------------------------------------------------------------------------------------------------------------------------------|
| 4_7  | Catalyst/ Electrochemical | 1649 | 2016.63 | Orr, Porous carbon, Oxygen reduction reaction, Supercapacitor, Porou, Carbon material, Graphene, Hierarchical porou, Hydrochar, High performance supercapacitor, Mah, Koh, Mesoporou, Electrochemical, Hydrothermal carbonization                         |
| 4_6  | Catalyst/ Electrochemical | 1706 | 2016.15 | Nanocellulose, Cellulose nanocrystal, Cnc, Cnf, Lignin, Cellulose nanofibril, Cellulose nanomaterial, Ggm, Nanocomposite, Nfc, Cellulose nanofiber, Chitosan, Hydrogel, Aerogel, Nanofibril                                                               |
| 4_11 | Catalyst/ Electrochemical | 914  | 2016.01 | Mah, Sodium ion battery, Lib, Rechargeable battery, Electrochemical performance, Li, Organic electrode material, Lithium, Cathode material, Electrode material, Capacity retention, Ion battery, Lithium ion battery, Electrolyte, Na ion battery         |
| 4_4  | Catalyst/ Electrochemical | 1922 | 2015.36 | Pla, Isosorbide, Polymer, Epoxy, Poly, Monomer, Lactide, Benzoxazine, Cardanol, Thermoset, Polyol, Polymerization, Polyester, Anticorrosive, Bisphenol                                                                                                    |
| 4_3  | Catalyst/ Electrochemical | 2102 | 2015.30 | Hydroxymethylfurfural, Hmf yield, Gvl, Furfural, Levulinic acid, Cellulose, Lignin, Valerolactone, Lignocellulosic biomas, Catalytic, Acrolein, Fructose, Glycerol, Ionic liquid, Fdca                                                                    |
| 4_8  | Catalyst/ Electrochemical | 1615 | 2015.18 | Cyclic carbonate, Co2 conversion, Methanol, Epoxide, Formic acid, Co, Catalytic, Hydrogen, Formate, Electrochemical reduction, Photocatalytic, Lohc, Catalyst, Mof, Carbon dioxide                                                                        |
| 4_5  | Catalyst/ Electrochemical | 1756 | 2015.09 | Natural fiber, Biocomposite, Natural fibre composite, Composite, Flax, Flexural, Pla, Biodegradable, Fiber, Tensile strength, Green composite, Mechanical property, Kenaf, Thermoplastic, Hemp                                                            |
| 4_10 | Catalyst/ Electrochemical | 1093 | 2014.93 | Catalytic activity, Catalyst, Kcc, Solvent free, Nanocatalyst, Pd, Reaction, Magnetic nanoparticle, Synthesi, Microwave, Excellent yield, Gold nanoparticle, Nanoparticle, Green, Aqueou                                                                  |
| 4_9  | Catalyst/ Electrochemical | 1366 | 2014.86 | Nanomaterial, Nanotechnology, Enm, Nanoparticle, Agnp, Photocatalytic, Chitosan, Silver nanoparticle, Nm, Np, Nano, Ferrate, Tio2, Tio, Uv                                                                                                                |
| 4_1  | Catalyst/ Electrochemical | 2254 | 2013.73 | Green chemistry, Solvent, Biocatalysi, Supercritical, Enzyme, Sustainable chemistry, Chemistry, Organic synthesi, Chiral, Ionic liquid, Catalytic, Green analytical, Pharmaceutical, Biocatalytic, Reaction                                               |
| 5_1  | Building                  | 2426 | 2015.56 | Geopolymer concrete, Uhpc, Compressive strength, Cement, Concrete, Pofa, Pozzolanic, Opc, Fly ash, Cementitiou, Mortar, Portland cement, Rha, Silica fume, Flexural                                                                                       |
| 5_9  | Building                  | 973  | 2015.13 | Asphalt mixture, Rap, Pavement sustainability, Asphalt binder, Asphalt pavement, Hma, Reclaimed asphalt pavement, Bituman, Wma additive, Warm mix asphalt, Rejuvenator, Crumb rubber, Bio binder, Virgin binder, Biobinder                                |
| 5_10 | Building                  | 900  | 2015.11 | Rammed earth wall, Brick, Compressive strength, Cseb, Cement, Clay brick, Burnt clay brick, Unconfined compressive strength, Unfired, Ceb, Fly ash, Geopolymer, Uc, Adobe, Earth building                                                                 |
| 5_5  | Building                  | 1390 | 2014.94 | Rca, Recycled aggregate concrete, Concrete aggregate, Recycled concrete aggregate, Natural aggregate, Compressive strength, Rac, Demolition waste, Recycled coarse aggregate, Coarse aggregate, Fine aggregate, Construction waste, Mortar, Cdw, Flexural |
| 5_7  | Building                  | 1251 | 2014.67 | Green roof system, Uhi, Extensive green roof, Urban climatic, Thermal comfort, Green facade, Green wall, Roof, Building, Urban heat island, Vertical greenery system, Outdoor thermal comfort, Vg, Green façade, Solar                                    |
| 5_2  | Building                  | 2173 | 2014.47 | Bim, Lca, Building material, Embodied energy, Information modeling, Environmental impact, Construction industry, Life cycle assessment, Tall building, Green, Material, Energy, Information modelling, Residential building, Sustainable building         |
| 5_4  | Building                  | 1473 | 2014.21 | Adaptive reuse, Heritage building, Historic building, Building stock, Urban renewal, Refurbishment, Retrofit, Sustainable refurbishment, Historical building, Urban regeneration, Energy performance, Social, Cultural, Environmental, Residential        |
| 5_11 | Building                  | 876  | 2013.75 | Ppp project, Project management, Mife, Construction project, Rvr, Sustainable, Infrastructure project, Public private partnership, Social, Sustainability, Environmental, Construction industry, Economic, Civil engineer, Mega-project                   |

|      |            |      |         |                                                                                                                                                                                                                                                                                                |
|------|------------|------|---------|------------------------------------------------------------------------------------------------------------------------------------------------------------------------------------------------------------------------------------------------------------------------------------------------|
| 5_8  | Building   | 1114 | 2013.68 | Occupant, Daylight, Building, Bioclimatic potential, Thermal comfort, Ieq, Poe, Vernacular architecture, Indoor environmental quality, Post occupancy evaluation, Comfort, Green building, Office building, Sustainable building, Indoor environment                                           |
| 5_6  | Building   | 1325 | 2013.18 | Leed nd, Breeam, Green building, Casbee, Building, Rating system, Environmental design, Urban, Sustainable building, Sbtool, Social, Sustainability, Intelligent building, Regenerative design, Assessment tool                                                                                |
| 5_3  | Building   | 1790 | 2012.84 | Gbt, Green building development, Sustainable construction project, Construction industry, Leed, Construction project, Gbts adoption, Contractor, Green construction project, Construction firm, Environmental, Building, Sustainable building, Construction company, Construction professional |
| 6_7  | Smart city | 1097 | 2015.87 | Bike sharing, Bicycle, Cyclist, Cycling infrastructure, Bs, Electric bicycle, Public bicycle, Car sharing, Pedestrian, Ride, Airbnb, Urban, Carsharing, City, Collaborative consumption                                                                                                        |
| 6_5  | Smart city | 1332 | 2015.81 | Smart city concept, Smart sustainable city, City, Urban, Iot, Ict, Smart mobility, Citizen, Sustainable city, Smartnes, Big data analytic, Smart city project, Smart city service, Big datum, Social                                                                                           |
| 6_9  | Smart city | 925  | 2014.57 | Ev, Electric vehicle, Bev, Hybrid electric vehicle, Prosumer, Energy justice, Phev, Smart grid, Eco driving, Electric bus, Vehicle, Plug, Renewable, V2g, Environmental                                                                                                                        |
| 6_3  | Smart city | 2639 | 2014.41 | Sustainability transition, Ull, Transition management, Grassroots innovation, Socio technical transition, Multi level perspective, Energy transition, Transition study, Technological innovation system, Urban, Strategic niche management, Renewable, Snm, Sociotechnical, Innovation system  |
| 6_6  | Smart city | 1192 | 2013.58 | Degrowth movement, Rebound effect, Green economy, Environmental, Economic growth, Social, Sustainable development, Ecological, Green growth, Time bank, Political, Community currency, Growth, Global, Article                                                                                 |
| 6_1  | Smart city | 3688 | 2013.11 | Tod, Public transport, Urban, Travel plan, Car use, Transit, Pedestrian, Transport policy, Walking, City, Car ownership, Sustainable transport, Travel behaviour, Mode choice, Sustainable mobility                                                                                            |
| 6_8  | Smart city | 1084 | 2012.91 | Sustainable consumption, Social practice theory, Environmental, Laundry, Consumption, Everyday, Household sustainability, Practice theory, Change, Green, Individual, Pro environmental, Consumer, Urban, Lifestyle                                                                            |
| 6_4  | Smart city | 1369 | 2012.50 | Urban form, Social sustainability, City, Compact city, Sustainable urban form, Crime, Neighbourhood, Residential, Greyfield, Environmental, Spatial, Public, Suburb, Community, Local                                                                                                          |
| 6_2  | Smart city | 2846 | 2010.69 | Urban sustainability, Eco city, City, Local agenda, Environmental, Sustainable development, Social, Green, Sustainability, Sustainable urban, Regional, Economic, Political, Sustainable city, New urbanist                                                                                    |
| 7_7  | Water      | 986  | 2015.32 | Nexu, Water energy food nexu, Water security, Wef nexu, Iwrm, Energy water nexu, Energy, Nexus approach, Water resource, Food, Urban, China, Sustainable, Transboundary, Potassium ferrate                                                                                                     |
| 7_9  | Water      | 946  | 2014.74 | Water footprint assessment, Wf, Virtual water trade, Blue water, Water resource, Grey water footprint, Gwf, Water use, Agricultural, Virtual water flow, Water scarcity, Total wf, Green water, Total water footprint, China                                                                   |
| 7_5  | Water      | 1337 | 2014.50 | Membrane distillation, Fo membrane, Desalination process, Osmosi, Draw solution, Reverse electrodialysi, Forward osmosi, Solar still, Ro, Reverse osmosi, Swro, Seawater desalination, Desalination plant, Brackish, Desalination technology                                                   |
| 7_2  | Water      | 1674 | 2012.96 | Lid, Sud, Stormwater management, Permeable pavement system, Bioretention cell, Rain garden, Sustainable urban drainage system, Urban, Perviou, Sfrb, Sustainable drainage system, Wsud, Low impact development, Suwm, Pervious concrete                                                        |
| 7_10 | Water      | 838  | 2012.73 | Ncp, North china plain, Groundwater resource, Winter wheat, Wue, Heihe river basin, Irrigation, Maize, Water resource, Hydrological, China, Arid, Mm, Hebei plain, Tarim                                                                                                                       |
| 7_1  | Water      | 2104 | 2012.70 | Groundwater resource, Aquifer system, Recharge rate, Groundwater level, Groundwater recharge, Hydrogeological, Groundwater management, Karst, Groundwater use, Sustainable groundwater management, Modflow, Hydrochemical, Groundwater storage, Arid, Irrigation                               |

|      |                        |       |      |         |                                                                                                                                                                                                                                                                                                 |
|------|------------------------|-------|------|---------|-------------------------------------------------------------------------------------------------------------------------------------------------------------------------------------------------------------------------------------------------------------------------------------------------|
| 7_8  | Water                  |       | 961  | 2012.55 | Handpump, Trachoma, Sanitation facility, Latrine, Wash, Rural, Water point, Open defecation, Rural water supply, Wua, Rural water service, Hygiene, Piped, Household toilet, Safe water                                                                                                         |
| 7_3  | Water                  |       | 1618 | 2011.94 | Soil salinity, Irrigation water, Irrigated agriculture, Saline water, Sodic, Salt, D, Arid, Salinity, Groundwater, Deficit irrigation, Conjunctive use, Water resource, Agricultural, Soil salinization                                                                                         |
| 7_4  | Water                  |       | 1374 | 2011.80 | Urine, Struvite precipitation, Ecosan, Human urine, Wwtp, Wastewater treatment plant, Nomix, Urban, Environmental, Sanitation system, Nutrient, Water, Sustainable, Uddt, Toilet                                                                                                                |
| 7_6  | Water                  |       | 1276 | 2009.90 | Water resource, Iwrm, Wjwsi, Basin, Hydrological, Weap, Watershed, Sustainable, Reservoir, Groundwater, Environmental, Drought, Water resources management, Water demand, Water supply                                                                                                          |
| 8_7  | Sustainable gy(others) | ener- | 855  | 2015.75 | Ekc hypothesis, Financial development, Economic growth, Renewable energy consumption, Environmental kuznet, Co2 emission, Renewable, Trade openness, Energy consumption, Ardl, Gdp, Fdi, Emission, Cointegration, Unidirectional causality                                                      |
| 8_4  | Sustainable gy(others) | ener- | 1189 | 2015.00 | Renewable energy source, District heating, Sdewe, Energy system, Environment systems sdewe, Solar, Electric vehicle, Heat, International centre, Dh, Electricity, Sustainable, Energyplan, Environment system, Smart                                                                            |
| 8_5  | Sustainable gy(others) | ener- | 979  | 2014.79 | Microgrid, Smart grid, Ev, Electric vehicle, Grid, Renewable, Ieee, Phev, Pev, Micro grid, V2g, Dg, Solar, Power system, Pv                                                                                                                                                                     |
| 8_3  | Sustainable gy(others) | ener- | 1473 | 2014.14 | Renewable energy source, Environmental, Fuzzy, Economic, Sustainable development, Ahp, Social, Criterium, Solar, Mcdm, Energy system, Method, Nuclear, Alternative, Mcda                                                                                                                        |
| 8_6  | Sustainable gy(others) | ener- | 964  | 2013.89 | China, Renewable energy development, In, Pakistan, Solar, Wind power industry, Energy, Sustainable development, Environmental, Economic, Nuclear, Taiwan, Coal, Ltd, Geothermal                                                                                                                 |
| 8_2  | Sustainable gy(others) | ener- | 1583 | 2013.31 | Exergy efficiency, Hydrogen production, Exergetic efficiency, Waste exergy ratio, Exergetic sustainability index, Solar, Exergy analysi, Environmental effect factor, Renewable, Hydrogen energy publication, Exergy destruction, Exergoeconomic, Thermodynamic, Thermochemical, Enviroeconomic |
| 8_1  | Sustainable gy(others) | ener- | 1646 | 2013.01 | Renewable energy, Rural electrification, Solar, Grid extension, Electricity acces, Solar home system, Mini grid, Microgrid, Energy acces, Electrification, Pv, Bangladesh, Sustainable, Diesel generator, Country                                                                               |
| 9_9  | Bioenergy              |       | 820  | 2015.52 | Pha production, Rhamnolipid, Biosurfactant production, Phb, Polyhydroxyalkanoate, Sophorolipid, Olive, Scg, Succinic acid, Omw, Whey, Spent coffee ground, Hydroxybutyrate co, Product, Lactic acid                                                                                             |
| 9_1  | Bioenergy              |       | 2352 | 2015.36 | Microalgae cultivation, Microalgal biomas, Lipid productivity, Algal biofuel, Algae, Biodiesel production, Scenedesmu, Lipid production, Biofuel production, Chlamydomona, Mixotrophic, Lipid content, Lipid accumulation, Photobioreactor, Nannochloropsis sp                                  |
| 9_7  | Bioenergy              |       | 1237 | 2015.08 | Biorefinery, Biomas, Integrated biorefinery, Bioethanol, Environmental, Biofuel, Ethanol, Economic, Shale ga, Lignocellulosic, Process synthesi, Lcsoft, Optimal, Sustainable, Bioenergy                                                                                                        |
| 9_4  | Bioenergy              |       | 1497 | 2015.02 | Xylose, Butanol production, Metabolic engineering, Ethanol, Lignocellulosic biomas, Heterologou, Bioethanol, Lignocellulose, Cyanobacterium, Glucose, Biobutanol, Biofuel, Microbial, Enzyme, Titer                                                                                             |
| 9_5  | Bioenergy              |       | 1428 | 2014.78 | Mfc technology, Microbial fuel cell, Anammox, Bioelectrochemical system, Microbial electrochemical, Smfc, Pmfc, Cathode, Anode, Biocathode, Maximum power density, Bioelectricity generation, Nitrite, Be, Electrode                                                                            |
| 9_8  | Bioenergy              |       | 1052 | 2014.43 | Biodiesel production, Jatropa curca, Curca, Diesel engine, Btdc, Transesterification reaction, Wco, Engine performance, Vegetable oil, Biofuel, Methanol, Ulsd, Fame, Diesel fuel, Bsfc                                                                                                         |
| 9_6  | Bioenergy              |       | 1384 | 2014.29 | Anaerobic digestion, Digestate, Bioga, Biogas production, Uasb, Co digestion, Sludge, Biomethane, Sewage sludge, Methane yield, Biogas plant, Ad, Vinasse, Organic, Mesophilic                                                                                                                  |
| 9_10 | Bioenergy              |       | 806  | 2013.86 | Biomas, Ash, Gasification, Coal, Combustion, Biomass ash, Torrefaction, Fuel, Torrefied, Pyrolysi, Synga, Char, Hydrochar, Renewable, Water hyacinth                                                                                                                                            |

|      |             |      |         |                                                                                                                                                                                                                                                                                               |
|------|-------------|------|---------|-----------------------------------------------------------------------------------------------------------------------------------------------------------------------------------------------------------------------------------------------------------------------------------------------|
| 9_2  | Bioenergy   | 1860 | 2013.10 | Switchgras, Miscanthu, Bioenergy crop, Ethanol, Energy crop, Biofuel, Panicum virgatum, Willow, Biomas, Lignocellulosic, Straw, Cellulosic, Srwc, Poplar, Sweet sorghum                                                                                                                       |
| 9_3  | Bioenergy   | 1793 | 2012.95 | Bioenergy system, Biofuel production, Sugarcane production, Ethanol production, Biodiesel production, Biomas, Jatropa, Environmental, Renewable, Iluc, Ej, Fossil, Ghg, Feedstock, Agricultural                                                                                               |
| 10_5 | Urban       | 1273 | 2015.12 | China, Undesirable output, Dea environmental assessment, Managerial disposability, Dea, Urban, Urbanization, Environmental efficiency, Eco efficiency, Economic, Data envelopment analysi, Non radial directional, Green, Industrial, Dmu                                                     |
| 10_4 | Urban       | 1376 | 2014.28 | Ree, Spent lithium ion battery, Spent lib, Use stock, Lithium, Rare earth element, Lib, Metal, Hanpp, Critical metal, Li, Material, Environmental, Cobalt, Copper                                                                                                                             |
| 10_7 | Urban       | 1074 | 2013.28 | Urban metabolism, City, Ecological network analysi, Ascendency, Urban metabolic, Environmental, China, Ena, Ecological, Emission, Sustainable urban, Energy, Economic, Eoli, Mfa                                                                                                              |
| 10_6 | Urban       | 1153 | 2012.33 | Emergy analysi, Sej ha, Emergy evaluation, Eyr, Emergy index, Emergy yield ratio, Elr, Emergy sustainability index, Total emergy, Emergy synthesi, Emergy investment ratio, Uev, Emergy accounting, Transformity, Esi                                                                         |
| 10_2 | Urban       | 2122 | 2011.89 | Urban sustainability indicator, Indicator, City, Environmental, Sustainable development indicator, Economic, Social, Sustainability indicator, China, Local, Sustainable urbanization, Index, Regional, Asses, Spatial                                                                        |
| 10_3 | Urban       | 1427 | 2011.34 | Hm2 cap, Ecological footprint model, Ecological deficit, Ef, Gha, Wackernagel, Ecological capacity, Biocapacity, Ecological carrying capacity, Capita ecological footprint, Emergy ecological, Ecological footprint analysi, Footprint family, Ecological surplu, Energy ecological footprint |
| 10_1 | Urban       | 2249 | 2008.58 | Isew, Gpus, Genuine saving, Sustainable economic welfare, Economic, Natural capital, Environmental, Genuine progress indicator, Sustainable development, Chichilnisky, Ecological economic, Sustainability, Inclusive wealth, Gdp, Social                                                     |
| 11_1 | Health care | 1260 | 2016.07 | Maternal mortality, Uhc, Neonatal mortality, Ncd, Newborn, Universal health coverage, U5mr, Livebirth, Sdg, Stillbirth, Health system, Child health, Fap sba, Sustainable development goal, Global health                                                                                     |
| 11_3 | Health care | 818  | 2014.49 | Sbirt, Patient, Ebp, Primary care practice, Clinical, Clinician, Intervention, Implementation science, Mental, Cfir, Clinic, Qi, Care, Referral, Implementation research                                                                                                                      |
| 11_4 | Health care | 631  | 2012.66 | Chw program, Hiv aid, Community health worker, Antiretroviral therapy, Maternal, Malarium, Newborn, Vhw, Asha, Lhw, Fsw, Child, Iccm, Patient, Orphan                                                                                                                                         |
| 11_5 | Health care | 604  | 2012.18 | Cbpr approach, Community participation, Hiap, African american, Participatory research, Hiit, Hiv, Health disparity, Intervention, Community academic partnership, Physical activity, Malarium, Patient, Church, Partnership                                                                  |
| 11_2 | Health care | 1257 | 2012.06 | Patient, Intervention, Sustainability, Program sustainability, Hiv, Community, Smgl, Clinical, Implementation, Sustainment, Evidence, Nurse, Ebp, Hospital, Child                                                                                                                             |
| 12_3 | Forest      | 1267 | 2014.10 | Rspo, Sustainable palm oil, Fairtrade, Palm oil, Roundtable, Certification, Fair trade, Vs, Coffee, Oil palm plantation, Sustainability standard, Smallholder, Peatland, Global, Ispo                                                                                                         |
| 12_8 | Forest      | 804  | 2011.80 | Medicinal plant species, Ethnobotanical study, Herbal medicine, Species, Wild edible, Ethnomedicinal, Plant species, Orchid, Conservation, Informant, Traditional medicine, Ethnobotany, Local, Fic, Ethnopharmacological                                                                     |
| 12_7 | Forest      | 1081 | 2010.33 | Bushmeat trade, Peccary, Hunting, Wildlife trade, Primate, Hunter, Species, Caiman, Wild meat, Hunted, Narwhal, Elephant, Bushmeat hunting, Conservation, Bat                                                                                                                                 |
| 12_2 | Forest      | 1379 | 2010.26 | Forest floor, Wth, Nutrient, Tree growth, Whole tree harvesting, Soil, Plantation, Understory, Hwp, Eucalyptu, Base cation, Pine, Eucalypt, Biomas, Mg                                                                                                                                        |

|      |         |      |         |                                                                                                                                                                                                                                                                                            |
|------|---------|------|---------|--------------------------------------------------------------------------------------------------------------------------------------------------------------------------------------------------------------------------------------------------------------------------------------------|
| 12_5 | Forest  | 1173 | 2009.91 | Ntfp, Non timber, Brazil nut, Non timber forest product, Medicinal plant, Baobab, Species, Palm, Forest, Frankincense, Agarwood, Tree, Agave, Harvest, Nontimber                                                                                                                           |
| 12_1 | Forest  | 1627 | 2009.90 | Saproxylic beetle, Forest management, Tree, Silvicultural, Boreal forest, Understory, Dead wood, Deadwood, Stand structure, Sustainable forest management, Fire, Species, Old growth, Biodiversity, Nothofagu                                                                              |
| 12_6 | Forest  | 1103 | 2009.10 | Ril, Unlogged forest, Logged forest, Tree, Mahogany, Forest, Selective logging, Deramakot, Tropical forest, Reduced impact logging, Silvicultural treatment, Logging, Liana, Timber species, Impact logging                                                                                |
| 12_4 | Forest  | 1232 | 2009.06 | Sustainable forest management, Forest management, Sfm, Certification, Fsc certification, Tosium, Stewardship council, Forestry, Certified, Indicator, Timber, Environmental, Economic, Criterium, Social                                                                                   |
| 13_3 | Fishery | 948  | 2013.58 | Abnj, National jurisdiction, Marine spatial planning, Msp, Ebsa, Seamount, Ocean, Benthic, Coastal, High sea, Ebm, Seabed, Marine biodiversity, Unclo, Fishery                                                                                                                             |
| 13_1 | Fishery | 1551 | 2012.86 | Aquaponic system, Imtum, Aquaculture system, Fish, Shrimp, Biofloc system, Seaweed, Tilapium, Shellfish, Bft, Cage, Mussel, Fishmeal, Multi trophic aquaculture, Salmon                                                                                                                    |
| 13_2 | Fishery | 1189 | 2011.87 | Fishery, Itq, Fisher, Fish stock, Fisheries subsidy, Fisheries management, Amerb, Small scale fishery, Catch, Marine, Common fisheries policy, Turf, Individual transferable quota, Fishing, Fisherman                                                                                     |
| 13_4 | Fishery | 925  | 2011.72 | Mangrove forest, Mangrofe, Shrimp farming, Mangrove ecosystem, Mangrove area, Coastal, Sundarban, Aquaculture, Rhizophora, Silver carp, Shrimp farm, Shrimp aquaculture, Mangrove resource, Fish, Bangladesh                                                                               |
| 13_5 | Fishery | 844  | 2009.53 | Msy, Fmsy, Maximum sustainable yield, Aspice, Fishery, Ceda, Catch, Fish, Surplus production model, Schaefer, Stock assessment, Biological reference point, Bmsy, Pella tomlinson model, Natural mortality                                                                                 |
| 14_4 | Tourism | 1052 | 2013.06 | Ski area, Tourism industry, Tourist, Sustainable tourism, Low carbon tourism, Destination, Climate change, Air travel, Tourism development, Environmental, Travel, Hotel, Visitor, Economic, Tourism sector                                                                                |
| 14_3 | Tourism | 1098 | 2013.05 | Hotel industry, Hospitality industry, Sustainable tourism, Tour operator, Tourist, Tourism industry, Csr, Environmental, Green hotel, Hotelier, Guest, Hotel guest, Hotel company, Hotel manager, Destination                                                                              |
| 14_5 | Tourism | 992  | 2013.03 | Tourism development, Cbt, Sustainable tourism development, Resident, Surf tourism, Community tourism, Tourist, Okavango deltum, Local community, Tourism industry, Tourism impact, Ecotourism, Rural tourism, Social, Destination                                                          |
| 14_1 | Tourism | 1456 | 2011.30 | Sustainable tourism development, Tourism development, Destination, Tourist destination, Tourism planning, Tourism destination, Overtourism, Local, Tourism industry, Cultural, Sustainable tourism policy, Tourism policy, Social, Economic, Rural tourism                                 |
| 14_2 | Tourism | 1299 | 2009.43 | Ecotourism development, Tourism development, Protected area, Local person, Conservation, Visitor, Tourist, National park, Ecotourist, Wildlife, Optional, Park, Sustainable tourism, Natural, Environmental                                                                                |
| 15_3 | CSR     | 1462 | 2015.20 | Sustainability reporting, Sustainability report, Csr disclosure, Integrated reporting, Grus, Disclosure, Environmental disclosure, Esg, Sustainability assurance, Corporate social responsibility, Sustainability disclosure, Company, Firm, Assurance provider, Assurance statement       |
| 15_6 | CSR     | 832  | 2013.77 | Esg, Csr, Djsi, Responsible investment, Financial performance, Srus, Corporate social responsibility, Social, Triodo, Firm, Responsible investing, Investor, Ecg, Environmental, Bank                                                                                                      |
| 15_2 | CSR     | 1658 | 2012.50 | Mine closure, Mining industry, Asm, Amd, Upl, Artisanal, Mineral, Small scale mining, Mining sector, Mining company, Csr, Social licence, Environmental, Minerals industry, Slo                                                                                                            |
| 15_5 | CSR     | 964  | 2011.89 | Sustainability accounting, Accountant, Environmental management accounting, Environmental accounting, Accounting, Corporate social, Sustainability reporting, Biodiversity reporting, Social, Company, Csr, Management accounting, Sustainable development, Sustainability report, Emerald |

|      |           |      |         |                                                                                                                                                                                                                                                                                                                       |
|------|-----------|------|---------|-----------------------------------------------------------------------------------------------------------------------------------------------------------------------------------------------------------------------------------------------------------------------------------------------------------------------|
| 15_4 | CSR       | 1055 | 2009.81 | Eium, Strategic environmental assessment, Sea proces, Iaium, Environmental assessment, Eia proces, Eia system, Environmental impact assessment, Sium, Ea, Sustainability assessment, Ecium, Social, Sustainable development, Cea                                                                                      |
| 15_1 | CSR       | 2379 | 2006.79 | Sustainable development, Environmental, Social, Economic, Sustainability, Ecological, Political, Environment, Development, Concept, Article, Global, Natural, Local, Human                                                                                                                                            |
| 16_4 | Education | 1154 | 2014.16 | Student, Education institution, Esd, Sustainability education, Sustainability competency, Learning, University, Sustainable development, Competency, Hesd, Transformative, Educational, Teacher, Curriculum, Environmental                                                                                            |
| 16_2 | Education | 1545 | 2013.72 | Hei, Education institution, University, Campu, Sustainable university, Campus sustainability, Rce, Student, Esd, Sustainability reporting, Environmental, Sustainable campu, Green university, Campuse, Sustainable development                                                                                       |
| 16_1 | Education | 1657 | 2013.24 | Esd, Early childhood education, Ecef, Environmental education, Education, Teacher education, Pre service teacher, Ese, Student teacher, Sustainability education, Child, Ef, Sustainable development, School, Educational                                                                                             |
| 16_5 | Education | 760  | 2013.16 | Business school curricula, Management education, Prme, Responsible management education, Business education, Student, Sustainability education, Education, Usr, Curriculum, Csr, Sustainable development, Social, Environmental, University                                                                           |
| 16_3 | Education | 1500 | 2011.44 | Engineering education, Student, Engineering student, Engineer, Course, Undergraduate, Civil, Engineering curriculum, Engineering program, Sustainability, Curriculum, Sustainable engineering, Abet, Engineering curricula, Civil engineering student                                                                 |
| 17_3 | Food      | 1213 | 2015.27 | Sustainable diet, Diet, Mediterranean diet, Dietary pattern, Vegetarian, Ghge, Nnd, Meat consumption, Meat substitute, Food system, Nutritional, Healthy diet, Nutrition, Dietary guideline, Vegan                                                                                                                    |
| 17_1 | Food      | 1995 | 2013.75 | Sustainable consumption behavior, Green product, Consumer, Pro environmental behavior, Loha, Environmental, Green marketing, Social, Purchase intention, Green consumer, Consumption, Study, Ethical consumption, Sustainable product, Marketer                                                                       |
| 17_4 | Food      | 1183 | 2013.68 | Animal welfare, Cow, Ruminant, Pig, Feed efficiency, Genetic, Breed, Diet, Enteric, Rfi, Aviary, Milk yield, Cattle, Ruminant, Livestock                                                                                                                                                                              |
| 17_5 | Food      | 701  | 2013.42 | Urban agriculture, Ua, Community garden, Rtg, Rooftop greenhouse, Upa, City, Vertical farming, Garden, Community gardening, Hydroponic, Vegetable, Peri urban agriculture, Food security, Social                                                                                                                      |
| 17_2 | Food      | 1532 | 2012.28 | Afn, Local food system, Food system, Alternative food network, Csa, Sfsc, Organic food, Farmers market, Farmer, Social, Food citizenship, Consumer, Sustainable food system, Rural, Sustainable                                                                                                                       |
| 18_4 | Green IcT | 461  | 2014.96 | Sustainable software development, Software sustainability, Software engineering, Requirements engineering, Green software engineering, Software system, Research software, Software development, Sustainable software engineering, Software product, Software engineer, Sustainability, Software change, Ict, Re4susy |
| 18_3 | Green IcT | 484  | 2013.93 | Data center, Datacenter, Cloud computing, Green sla, Sustainable data center, Cloud data center, Iot, Green cloud computing, Scloud, Renewable, Ieee, Server, Plda, Green iot, Smartbay                                                                                                                               |
| 18_1 | Green IcT | 899  | 2013.69 | Sustainable hcus, Hcus, Sustainable interaction design, Acm, Persuasive technology, Shcus, Interaction design, Hci community, Eco feedback, User, Design fiction, Human computer interaction, Hci researcher, Ubicomp, Owner author                                                                                   |
| 18_2 | Green IcT | 801  | 2013.64 | Green ict, Green information system, Green information technology, Information system, Environmental sustainability, Git, Ict, Organization, Data center, Sustainable, Energy informatic, Adoption, Information technology, Sustainability, Organizational                                                            |
| 18_5 | Green IcT | 453  | 2011.92 | Telecentre, Ict, Rural, Government development, Ict4d, Mobile, Egov, Digital divide, Telecenter, Communication technology, Rural ict project, Country, Sustainable, Social, Public value                                                                                                                              |

|      |                       |     |         |                                                                                                                                                                                                                                                                                                             |
|------|-----------------------|-----|---------|-------------------------------------------------------------------------------------------------------------------------------------------------------------------------------------------------------------------------------------------------------------------------------------------------------------|
| 19_4 | Waste management      | 306 | 2014.85 | Msw, Municipal solid waste management, Incineration, Wte plant, Waste, Landfill mining, Lca, Environmental impact, Energy recovery, Anaerobic digestion, Life cycle assessment, Solid, Gasification, Lfe, Aif                                                                                               |
| 19_5 | Waste management      | 250 | 2014.37 | Msw management, Municipal solid waste management, Mswm, Solid waste management, Waste management system, City, Swm, Environmental, Iswm, Sustainable solid, Landfill, Economic, Isswm, Country, Municipal solid waste                                                                                       |
| 19_3 | Waste management      | 330 | 2012.8  | Politechnika, Sustainable development, Social, Environmental, Economic, Lubelska, Ecophilosophy, Poland, Human, Ecological, Polish, Natural, Article, Concept, Environment                                                                                                                                  |
| 19_2 | Waste management      | 346 | 2012.26 | Waste picker, Municipal solid waste management, Mswm, Solid waste management, Msw management, Informal sector, Swm, Waste management, Informal waste picker, City, Environmental, Sustainable, Urban, Waste picking, Landfill                                                                               |
| 19_1 | Waste management      | 371 | 2011.95 | Msw management, Municipal solid waste management, Waste management system, Environmental, Mswm, Solid, Landfill, Economic, Easewaste, Sustainable, Swm, Solid waste management, Model, Transfer station, Municipal solid waste                                                                              |
| 20_5 | Biochar               | 155 | 2016.54 | Biochar, Pyrolysi, Activated carbon, Char, Mg, Aqueou, Bio oil, Chicken manure biochar, Mbbc, Adsorbent, Ius, Adsorption, Cd, Carbon, Arsenic                                                                                                                                                               |
| 20_1 | Biochar               | 506 | 2015.02 | Biochar application rate, Soil amendment, Terra pretum, Biochar amendment, Biochar addition, Amazonian dark earth, Organic, Nutrient, Charcoal, Bc, Maize, Pyrolysis temperature, Pyrolysi, Índio, Soil fertility                                                                                           |
| 20_3 | Biochar               | 296 | 2014.36 | Sustainable remediation forum, Remediation project, Gsr, Contaminated land, Remediation alternative, Remedial alternative, Soil, Environmental, Site, Smarte, Remediation practitioner, Remediation technology, Green, Surf uk, Remediation industry                                                        |
| 20_2 | Biochar               | 369 | 2012.62 | Phytoremediation, Soil, Phytoextraction, Metal, Mine tailing, Heavy metal, Plant, Tailing, Cd, Pah, Organic, Remediate, Cu, Pb, Arsenic                                                                                                                                                                     |
| 20_4 | Biochar               | 266 | 2011.70 | Brownfield regeneration, Brownfield redevelopment project, Redevelopment, Brownfield site, Urban wasteland, Km adoption, Szna, Sustainable urban, Site, Brownfield land, Environmental, Sustainable brownfield regeneration, Industrial heritage, City, Regeneration                                        |
| 21_4 | Fiscal sustainability | 165 | 2013.94 | Fiscal sustainability, Public debt, Debt sustainability, Primary surplus, Gdp, Fiscal policy, Fiscal limit, Primary balance, Fiscal reaction function, Fiscal stance, Government debt, Monetary policy, Fiscal space, Sovereign, Bohn                                                                       |
| 21_2 | Fiscal sustainability | 190 | 2012.38 | Pension system, Pension reform, Retirement age, Reform, Social security system, Demographic, Public pension system, Spanish pension system, Financial sustainability, Payg, Fiscal, Individual account, Actuarial, Pension adequacy, Economic                                                               |
| 21_5 | Fiscal sustainability | 112 | 2011.25 | Pension system, Pension reform, Social security, Child allowance, Pension scheme, Economic, China, Reform, Old age security, Country, Financial, Pension benefit, Ndc, Sustainable, Retirement                                                                                                              |
| 21_1 | Fiscal sustainability | 229 | 2010.54 | Fiscal sustainability, Public debt sustainability, Fiscal policy, Intertemporal budget constraint, Debt, Budget deficit, Structural break, Government debt, Intertemporal, Cointegration, Gdp, Public finance, Primary surplus, Fiscal deficit, Sustainability                                              |
| 21_3 | Fiscal sustainability | 174 | 2010.54 | Current account deficit, Current account sustainability, Intertemporal approach, Cointegration, Structural break, Current account balance, External imbalance, Import, Trade deficit, Current account imbalance, External sustainability, Global imbalance, Export, External debt, Current account position |
| 22_1 | Nanogenerator         | 159 | 2017.44 | Teng, Triboelectric nanogenerator, Wearable electronic, Stretchable, Nanogenerator, Ma, Human motion, Scpu, Biomechanical energy, Self, Sustainable power source, Portable electronic, Flexible, Supercapacitor, Mechanical energy                                                                          |
| 22_4 | Nanogenerator         | 134 | 2016.57 | Teng, Triboelectric nanogenerator, Wearable electronic, Piezoelectric, Stretchable, Nanogenerator, Mechanical energy, Ma, Electrostatic induction, Self, Flexible, Implantable, Sustainable power source, Output performance, Biomechanical                                                                 |

|      |                  |     |         |                                                                                                                                                                                                                                                               |
|------|------------------|-----|---------|---------------------------------------------------------------------------------------------------------------------------------------------------------------------------------------------------------------------------------------------------------------|
| 22_2 | Nanogenerator    | 153 | 2016.44 | Wireless, Wpcn, Sensor node, Energy harvesting, Swipt, Eppa, Wireless rechargeable sensor network, Iot device, Wireless power transfer, Wrsn, Wpt, Mobile charger, Ieee, Eh, Rf energy                                                                        |
| 22_5 | Nanogenerator    | 133 | 2016.13 | Bs, Cellular network, Mobile operator, Tamarillo, Base station, Lte, Renewable, Ieee, Spatial modulation, Green cellular, Femtocell, Future mobile network, Solar, Energy efficiency, Small cell                                                              |
| 22_3 | Nanogenerator    | 144 | 2013.34 | Wsn, Wireless sensor network, Sensor node, Energy harvesting, Node, Sustainable sensor network, Eh wsn, Sensor network, Solar, Ieee, Sustainable, System, Battery, Wireless, Low                                                                              |
| 23_5 | Entrepreneurship | 90  | 2017.21 | Vsi entrepreneurship, Sustainability center, Economic, Social, Biological asset, Sustainable development, Eu, Renewable, Unfair hrn practice, Energy security, Country, Development, New, Environmental entrepreneurship, Financial                           |
| 23_1 | Entrepreneurship | 129 | 2017.10 | Vsi entrepreneurship, Sustainability center, Economic, Financial literacy, Unmanned vehicle, State coercion, Lithuania, Country, Identify, Investment security, External labor migration, Eu, Ukraine, Research, Investment climate                           |
| 23_3 | Entrepreneurship | 104 | 2016.61 | Latvium, Vsi entrepreneurship, Sustainability center, Economic, Social innovation, Latgale region, Smart, Rural, Financial transparency, Region, Sustainable development, Biotic organization, Russian, Research, Dynamic capability                          |
| 23_4 | Entrepreneurship | 103 | 2016.11 | Economic, Enterprise architecture, Russian, International business information management association ibima, Renegotiation, Almaty, Arctic, Financial, Global crisis management, Subsystem busines, Russium, Regional, International, Petersburg, Development |
| 23_2 | Entrepreneurship | 114 | 2013.23 | Sustainable competitiveness, Economic growth, Sustainable development, Fdi impact, Country, Lithuania, Social, Functional review, Latvium, Competitiveness, Development, European, Lithuanian, Financial, Infamy                                              |

---
